# Supplementary material for: Changes to Soil Microbiome Resulting from Synergetic Effects of Fungistatic Compounds Pyrimethanil and Fluopyram in Lowbush Blueberry Agriculture, with Nine Fungicide Products Tested
Source: MDPI journal article supplement (doi:10.3390/microorganisms11020410), 2023-02-06
Supplement: s1 [file s1]

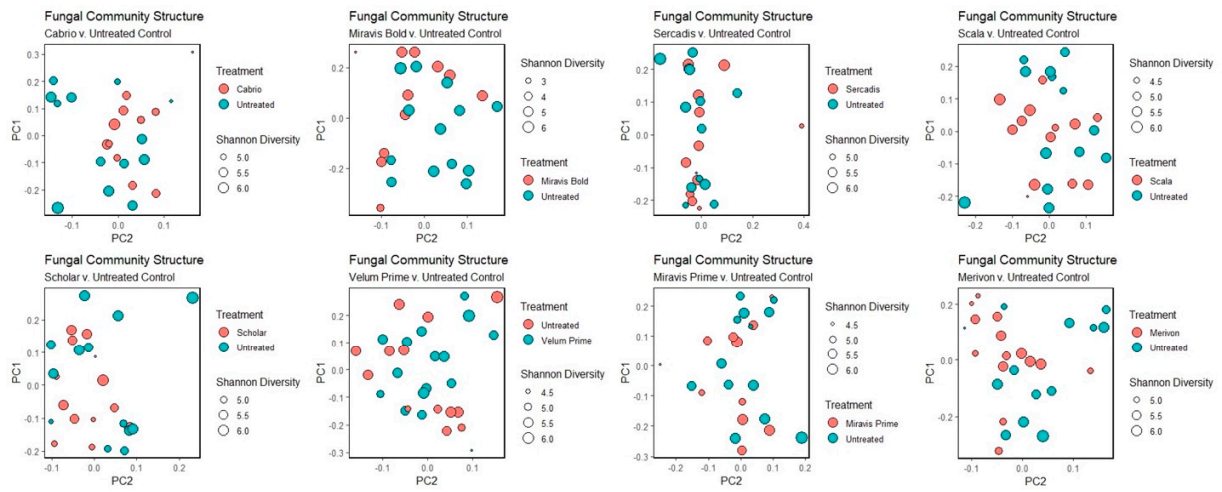

**Fig. S1:** PCoA of fungal community structures. PCoA comparing individual treatments and untreated control.

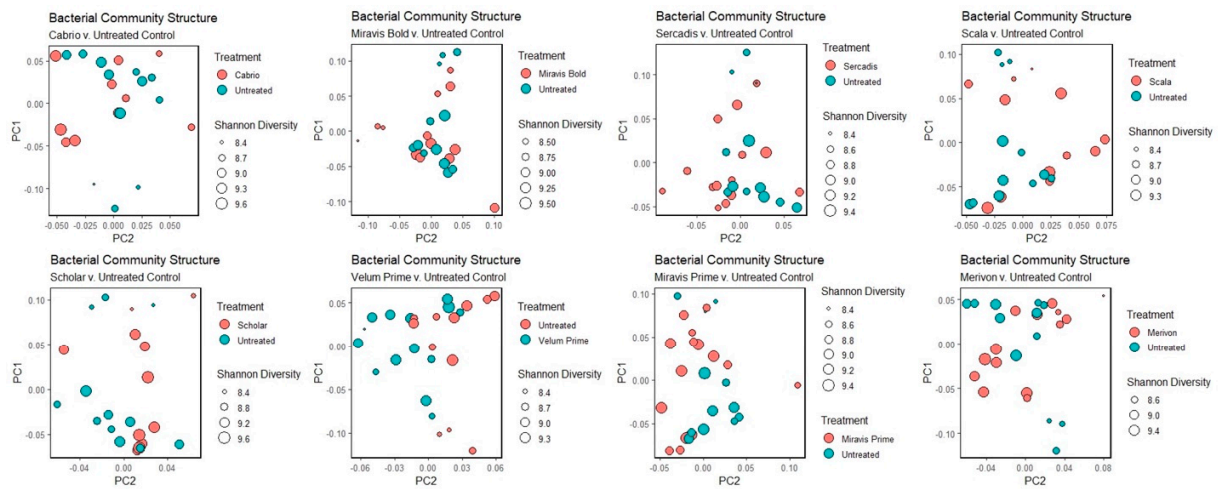

**Fig. S2:** PCoA of bacterial community structures. PCoA comparing individual treatments and untreated control.
